# Supplementary material for: COVID-19-related healthcare impacts: an uncontrolled, segmented time-series analysis of tuberculosis diagnosis services in Mozambique, 2017–2020
Source: PubMed Central journal article supplement — BMJ Glob Health. 2022 Apr 19;7(4):e007878. doi: 10.1136/bmjgh-2021-007878 (PMC9021460; doi:10.1136/bmjgh-2021-007878), 2022-04-19
Supplement: bmjgh-2021-007878supp001.pdf [file bmjgh-2021-007878supp001.pdf]

## Supplemental Materials

### Appendix 1

Supplemental Table 1. Notifications of pulmonary TB in Mozambique and incidence rates per 100,000 habitants, 2020

| Region           | Cases observed 2020 |       |       |       |       | Cases per 100,000 habitants (annualized)* |       |       |       |       |
|------------------|---------------------|-------|-------|-------|-------|-------------------------------------------|-------|-------|-------|-------|
|                  | Q1                  | Q2    | Q3    | Q4    | Total | Q1                                        | Q2    | Q3    | Q4    | Total |
| <u>North</u>     | 5464                | 4537  | 5167  | 5006  | 20174 | 204.1                                     | 169.5 | 193.0 | 187.0 | 188.4 |
| Niassa           | 1323                | 983   | 1121  | 1053  | 4480  | 264.8                                     | 196.8 | 224.4 | 210.8 | 224.2 |
| Cabo Delgado     | 1329                | 901   | 1233  | 1219  | 4682  | 210.5                                     | 142.7 | 195.3 | 193.1 | 185.4 |
| Nampula          | 2812                | 2653  | 2813  | 2734  | 11012 | 181.9                                     | 171.6 | 182.0 | 176.8 | 178.1 |
| <u>Central</u>   | 10162               | 10490 | 12308 | 11944 | 44904 | 311.7                                     | 321.8 | 377.6 | 366.4 | 344.4 |
| Zambézia         | 3891                | 4338  | 5684  | 5134  | 19047 | 279.6                                     | 311.7 | 408.4 | 368.9 | 342.1 |
| Tete             | 1947                | 2235  | 2157  | 2161  | 8500  | 268.5                                     | 308.3 | 297.5 | 298.0 | 293.1 |
| Manica           | 2318                | 1679  | 2468  | 2275  | 8740  | 438.5                                     | 317.6 | 466.9 | 430.4 | 413.3 |
| Sofala           | 2006                | 2238  | 1999  | 2374  | 8617  | 326.5                                     | 364.2 | 325.3 | 386.4 | 350.6 |
| <u>South</u>     | 6731                | 4728  | 4865  | 5887  | 22211 | 361.7                                     | 254.0 | 261.4 | 316.3 | 298.4 |
| Inhambane        | 1638                | 1088  | 1287  | 1714  | 5727  | 427.7                                     | 284.1 | 336.0 | 447.5 | 373.8 |
| Gaza             | 1893                | 1571  | 1595  | 1691  | 6750  | 523.7                                     | 434.6 | 441.2 | 467.8 | 466.8 |
| Maputo Provincia | 3200                | 2069  | 1983  | 2482  | 9734  | 286.6                                     | 185.3 | 177.6 | 222.3 | 217.9 |
| <u>Total</u>     | 22357               | 19755 | 22340 | 22837 | 87289 | 286.7                                     | 253.3 | 286.5 | 292.9 | 279.8 |

Note. The quarterly number of new cases is reported per one-quarter of the national population so that quarterly and annual figures can be compared. Data for Maputo City and Maputo Province were merged and presented as Maputo Provincia.

Supplemental Table 2. Expected number of 2020 notifications of pulmonary TB in Mozambique using the multilevel model, and absolute differences between the observed and expected counts

| Region | Model expected | Absolute differences | % Loss from |
|--------|----------------|----------------------|-------------|
|--------|----------------|----------------------|-------------|

|                     |       |       |       |       |        |       |       |       |       |        | expected |              |
|---------------------|-------|-------|-------|-------|--------|-------|-------|-------|-------|--------|----------|--------------|
|                     | Q1    | Q2    | Q3    | Q4    | Total  | Q1    | Q2    | Q3    | Q4    | Total  | %        | 95% CI       |
| <u>North</u>        | 5398  | 5494  | 5598  | 5709  | 22199  | 66    | -957  | -431  | -703  | -2025  | -9.1     | -17.4, -0.4  |
| Niassa              | 1255  | 1317  | 1384  | 1454  | 5410   | 68    | -334  | -263  | -401  | -930   | -17.2    | -25.9, -6.4  |
| Cabo Delgado        | 1209  | 1253  | 1298  | 1346  | 5107   | 120   | -352  | -65   | -127  | -425   | -8.3     | -17.1, 2.0   |
| Nampula             | 2934  | 2924  | 2916  | 2909  | 11682  | -122  | -271  | -103  | -175  | -670   | -5.7     | -13.6, 1.4   |
| <u>Central</u>      | 10542 | 10703 | 10875 | 11057 | 43177  | -380  | -213  | 1433  | 887   | 1727   | 4.0      | -5.1, 13.2   |
| Zambézia            | 4383  | 4445  | 4508  | 4575  | 17911  | -492  | -107  | 1176  | 559   | 1136   | 6.3      | -1.2, 14.2   |
| Tete                | 1822  | 1863  | 1906  | 1951  | 7543   | 125   | 372   | 251   | 210   | 957    | 12.7     | 2.8, 22.8    |
| Manica              | 2257  | 2336  | 2418  | 2505  | 9516   | 61    | -657  | 50    | -230  | -776   | -8.2     | -17.6, 2.4   |
| Sofala              | 2080  | 2060  | 2042  | 2026  | 8208   | -74   | 178   | -43   | 348   | 409    | 5.0      | -6.5, 14.9   |
| <u>South</u>        | 9000  | 9279  | 9571  | 9878  | 37727  | -2269 | -4551 | -4706 | -3991 | -15516 | -41.1    | -50.4, -31.0 |
| Inhambane           | 1615  | 1653  | 1693  | 1735  | 6695   | 23    | -565  | -406  | -21   | -968   | -14.5    | -23.6, -4.7  |
| Gaza                | 1842  | 1868  | 1894  | 1922  | 7527   | 51    | -297  | -299  | -231  | -777   | -10.3    | -20.5, -0.1  |
| Maputo<br>Provincia | 5543  | 5758  | 5984  | 6221  | 23505  | -2343 | -3689 | -4001 | -3739 | -13771 | -58.6    | -67.7, -48.3 |
| <u>Total</u>        | 24939 | 25476 | 26043 | 26645 | 103103 | -2582 | -5721 | -3703 | -3808 | -15814 | -15.3    | -24.3, -5.9  |

Note. Data for Maputo City and Maputo Province were merged and presented as Maputo Provincia.

## Appendix 2:

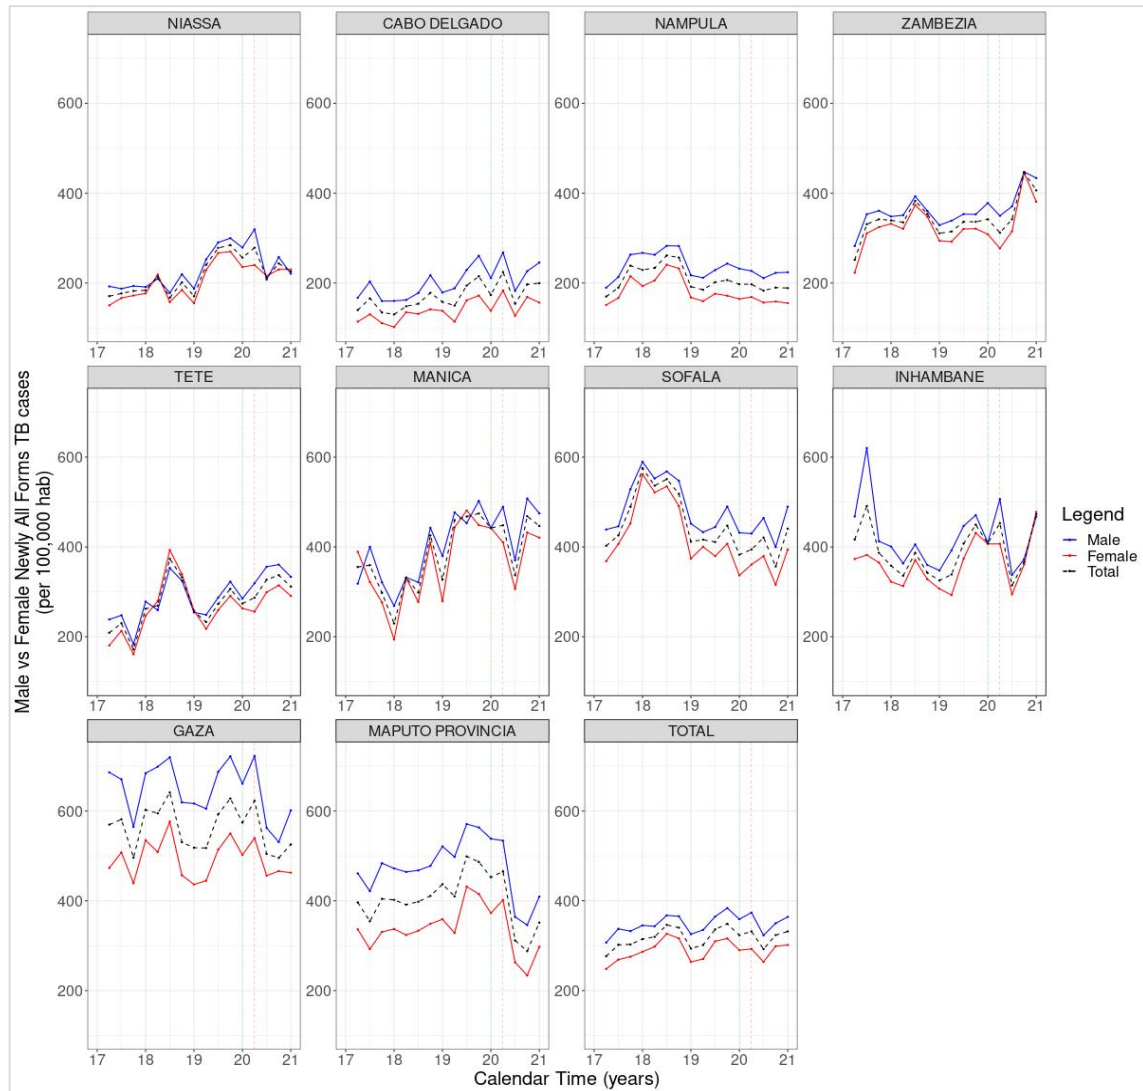

Supplemental Figure 1. Incidence of all forms of TB per 100,000 habitants in Mozambique, by sex and province. Data for Maputo City and Maputo Province were merged and presented as Maputo Provincia.

## Appendix 3:

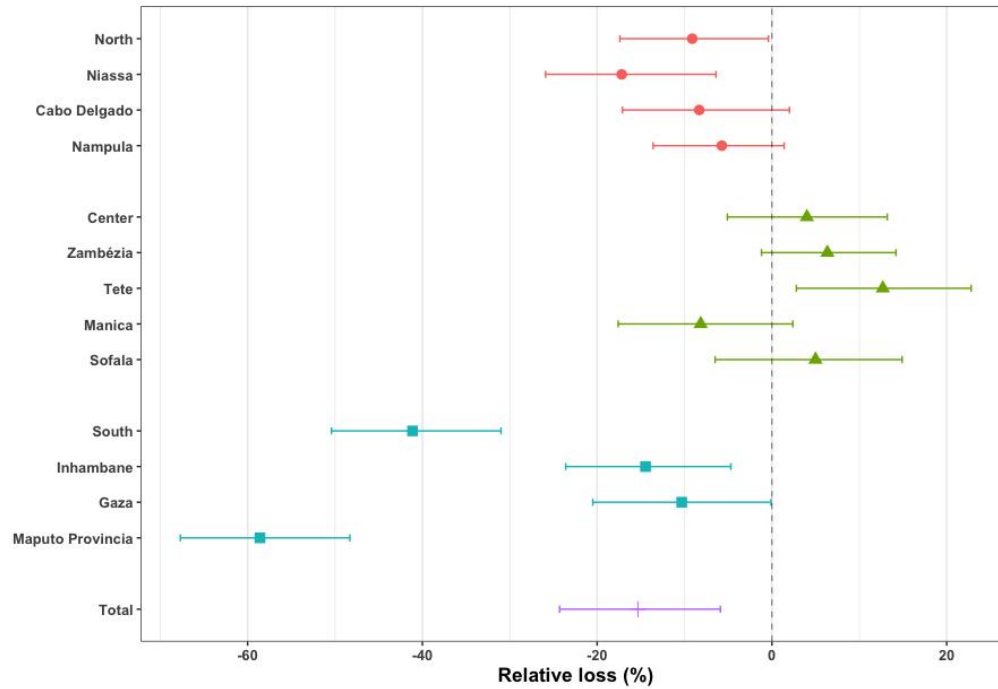

Supplemental Figure 2. Relative loss in pulmonary TB notifications and 95% confidence intervals. Provinces are grouped by region (north, central, and south); both province and regional means are shown. Data for Maputo City and Maputo Province were merged and presented as Maputo Provincia. The purple line labeled “Total” shows the mean national estimate.

## Appendix 4:

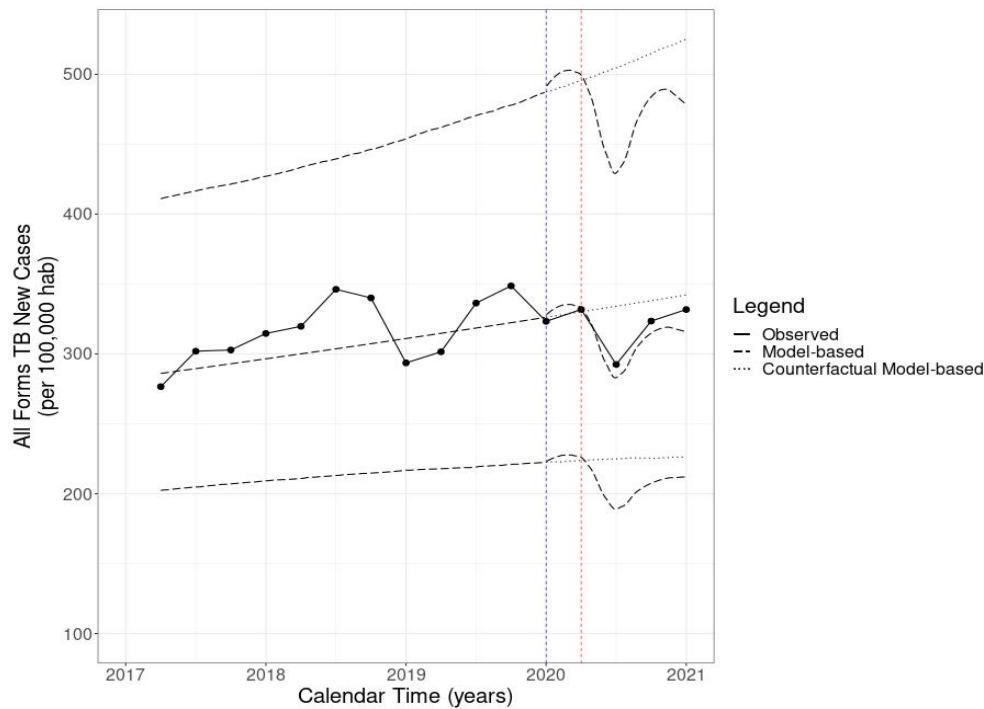

Supplemental Figure 3 –Mozambique New all forms of TB diagnosed per 100,000 habitants. The solid line is the observed data. The dashed line is the model based (fitted with its confidence interval). The dotted line is the counterfactual (i.e indicates what would have happened if the pre-2020 was extended to 2020) or the forecast based on the previous year's trend. The vertical dotted lines are to indicate the beginning of 2020 and the end of the first quarter of 2020 (which coincides with measures of public calamity).

**Appendix 5:****a) The model with random-effects of the district of the province (model 1)**

| <b>Coefficient</b>             | <b>Estimate</b> | <b>Est.Error</b> | <b>I-95%</b> |                 |
|--------------------------------|-----------------|------------------|--------------|-----------------|
|                                |                 |                  | <b>CI</b>    | <b>u-95% CI</b> |
| (Intercept)                    | -7.255          | 0.175            | -7.601       | -6.894          |
| timeyrc                        | 0.048           | 0.029            | -0.009       | 0.105           |
| covid                          | 0.017           | 0.038            | -0.058       | 0.093           |
| covid.q2                       | -0.149          | 0.065            | -0.279       | -0.019          |
| covid.q3                       | -0.049          | 0.087            | -0.225       | 0.124           |
| covid.q4                       | -0.035          | 0.057            | -0.149       | 0.079           |
| SD Random-Effects for district |                 |                  |              |                 |
| sd(Intercept)                  | 0.3161          | 0.0212           | 0.2770       | 0.3606          |
| sd(timeyrc)                    | 0.0880          | 0.0087           | 0.0715       | 0.1055          |
| sd(covid)                      | 0.1857          | 0.0225           | 0.1431       | 0.2301          |
| sd(covid.q2)                   | 0.0406          | 0.0298           | 0.0016       | 0.1102          |
| sd(covid.q3)                   | 0.0299          | 0.0226           | 0.0012       | 0.0836          |
| sd(covid.q4)                   | 0.0491          | 0.0354           | 0.0018       | 0.1296          |
| SD Random-Effects for province |                 |                  |              |                 |
| sd(Intercept)                  | 0.5169          | 0.1542           | 0.3084       | 0.8930          |
| sd(timeyrc)                    | 0.0815          | 0.0276           | 0.0432       | 0.1484          |
| sd(covid)                      | 0.0677          | 0.0460           | 0.0034       | 0.1745          |
| sd(covid.q2)                   | 0.1711          | 0.0626           | 0.0807       | 0.3245          |
| sd(covid.q3)                   | 0.2454          | 0.0787           | 0.1355       | 0.4420          |
| sd(covid.q4)                   | 0.1450          | 0.0557           | 0.0606       | 0.2777          |
| shape                          | 19.5396         | 0.7838           | 18.0426      | 21.1189         |

b) the model without province random-effects but with fixed-effects at province level (as dummy indicators) (model 2)

| Coefficient                    | Estimate | Est.Error | I-95%   |          |
|--------------------------------|----------|-----------|---------|----------|
|                                |          |           | CI      | u-95% CI |
| Intercept                      | -7.757   | 0.087     | -7.927  | -7.586   |
| timeyrc                        | 0.043    | 0.011     | 0.022   | 0.065    |
| covid                          | 0.018    | 0.030     | -0.041  | 0.078    |
| covid.q2                       | -0.138   | 0.030     | -0.197  | -0.081   |
| covid.q3                       | -0.028   | 0.030     | -0.087  | 0.030    |
| covid.q4                       | -0.030   | 0.030     | -0.088  | 0.028    |
| Province                       |          |           |         |          |
| Niassa                         | 0.000    |           |         |          |
| Cabo Delgado                   | -0.179   | 0.121     | -0.414  | 0.059    |
| Nampula                        | 0.211    | 0.113     | -0.010  | 0.432    |
| Zambezia                       | 0.556    | 0.113     | 0.335   | 0.780    |
| Tete                           | 0.142    | 0.122     | -0.101  | 0.379    |
| Manica                         | 0.538    | 0.130     | 0.285   | 0.790    |
| Sofala                         | 0.964    | 0.129     | 0.707   | 1.220    |
| Inhambane                      | 0.799    | 0.125     | 0.558   | 1.046    |
| Gaza                           | 1.110    | 0.131     | 0.851   | 1.366    |
| Maputo Provincia               | 0.836    | 0.126     | 0.592   | 1.081    |
| SD Random-Effects for district |          |           |         |          |
| sd(Intercept)                  | 0.3178   | 0.0218    | 0.2781  | 0.3625   |
| sd(timeyrc)                    | 0.1063   | 0.0091    | 0.0892  | 0.1247   |
| sd(covid)                      | 0.2205   | 0.023     | 0.1772  | 0.2669   |
| sd(covid.q2)                   | 0.0447   | 0.0321    | 0.002   | 0.1178   |
| sd(covid.q3)                   | 0.0536   | 0.0371    | 0.0025  | 0.1364   |
| sd(covid.q4)                   | 0.0493   | 0.0352    | 0.0021  | 0.1298   |
| shape                          | 18.6016  | 0.7443    | 17.1851 | 20.111   |

c) the model without province random-effects neither the fixed-effects at province level (as dummy indicators) (model 3)

| Coefficient                    | Estimate | Est.Error | I-95%   |          |
|--------------------------------|----------|-----------|---------|----------|
|                                |          |           | CI      | u-95% CI |
| Intercept                      | -7.305   | 0.042     | -7.387  | -7.223   |
| timeyrc                        | 0.044    | 0.011     | 0.022   | 0.065    |
| covid                          | 0.018    | 0.030     | -0.041  | 0.077    |
| covid.q2                       | -0.138   | 0.029     | -0.196  | -0.081   |
| covid.q3                       | -0.029   | 0.030     | -0.087  | 0.030    |
| covid.q4                       | -0.031   | 0.030     | -0.089  | 0.027    |
| SD Random-Effects for district |          |           |         |          |
| sd(Intercept)                  | 0.3178   | 0.0218    | 0.2781  | 0.3625   |
| sd(timeyrc)                    | 0.1063   | 0.0091    | 0.0892  | 0.1247   |
| sd(covid)                      | 0.2205   | 0.023     | 0.1772  | 0.2669   |
| sd(covid.q2)                   | 0.0447   | 0.0321    | 0.002   | 0.1178   |
| sd(covid.q3)                   | 0.0536   | 0.0371    | 0.0025  | 0.1364   |
| sd(covid.q4)                   | 0.0493   | 0.0352    | 0.0021  | 0.1298   |
| shape                          | 18.6544  | 0.7508    | 17.2249 | 20.1644  |

d) comparison of the 3 models using the widely available information criterion (WAIC)

|                 | WAIC        | SE         |
|-----------------|-------------|------------|
| Model 1         | -11652.0    | 65.6       |
| Model 2         | -11700.8    | 64.4       |
| Model 3         | -11703.2    | 64.0       |
| Model1 - Model2 | <b>48.8</b> | <b>8.6</b> |
| Model1 - Model3 | <b>51.2</b> | <b>9.9</b> |



## Appendix 6:

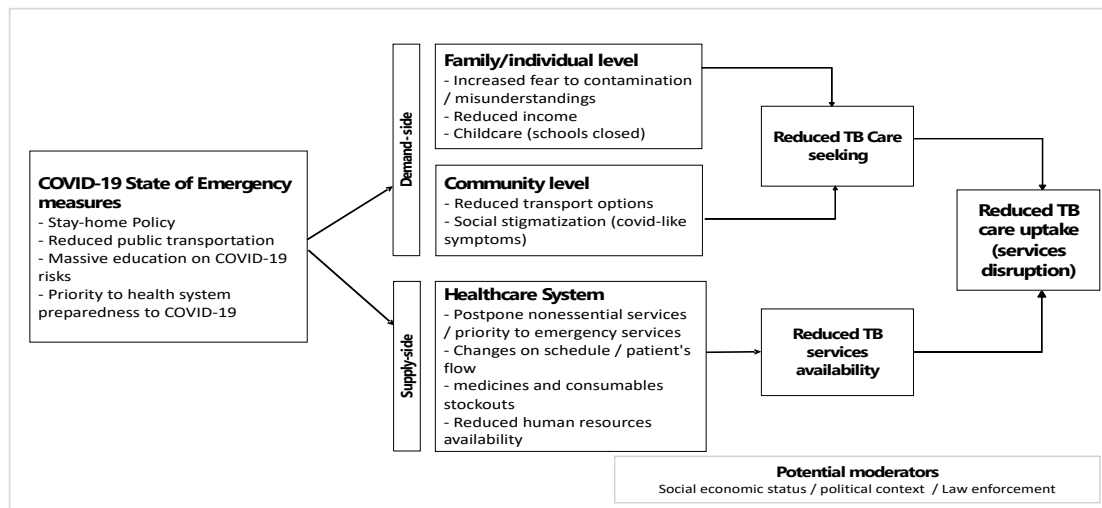

Supplemental Figure 4: Conceptual framework

The SoE (level 3) measures led to immediate restrictions on several services, including education, public transportation, and the health-care delivery system. These measures affected both healthcare seeking and service availability. Supplemental Figure 4 was drawn to summarise the cause-effect theory. It highlights the potential pathways that could explain the association between COVID-19-related measures and TB service disruptions.
